# Supplementary material
Source: PubMed Central journal article supplement (PMC6924934)
Supplement: acm-95-111-s001.pdf [file acm-95-111-s001.pdf]

Supplemental digital content for Jurich D, Santen SA, Paniagua M, et al. Effects of moving the United States Medical Licensing Examination Step 1 after core clerkships on Step 2 Clinical Knowledge performance. Acad Med.

## Supplemental Digital Appendix 1

### Comparison of Pre-Curricular Change (N = 1,648) and Post-Curricular Change (N = 1,571) Samples by Incoming MCAT Scores, Age, Gender, and Ethnicity

| Characteristic                 | Pre-change  | Post-change |
|--------------------------------|-------------|-------------|
| <b>Mean MCAT (SD)</b>          | 32.5 (4.18) | 32.7 (3.91) |
| <b>Mean age (SD)</b>           | 33.5 (3.04) | 30.8 (3.14) |
| <b>Gender (%)</b>              |             |             |
| Female                         | 44          | 44          |
| Male                           | 56          | 56          |
| <b>Ethnicity (%)</b>           |             |             |
| American Indian/Alaskan Native | 0.4         | 0.1         |
| Asian/Pacific Islander         | 17          | 19          |
| Black (not of Hispanic origin) | 5           | 4           |
| Hispanic                       | 6           | 5           |
| White (not of Hispanic origin) | 59          | 55          |
| Other <sup>a</sup>             | 12          | 16          |

<sup>a</sup>Other represents examinees who selected “do not wish to respond,” “multiple,” or “other.”

## Supplemental Digital Appendix 2

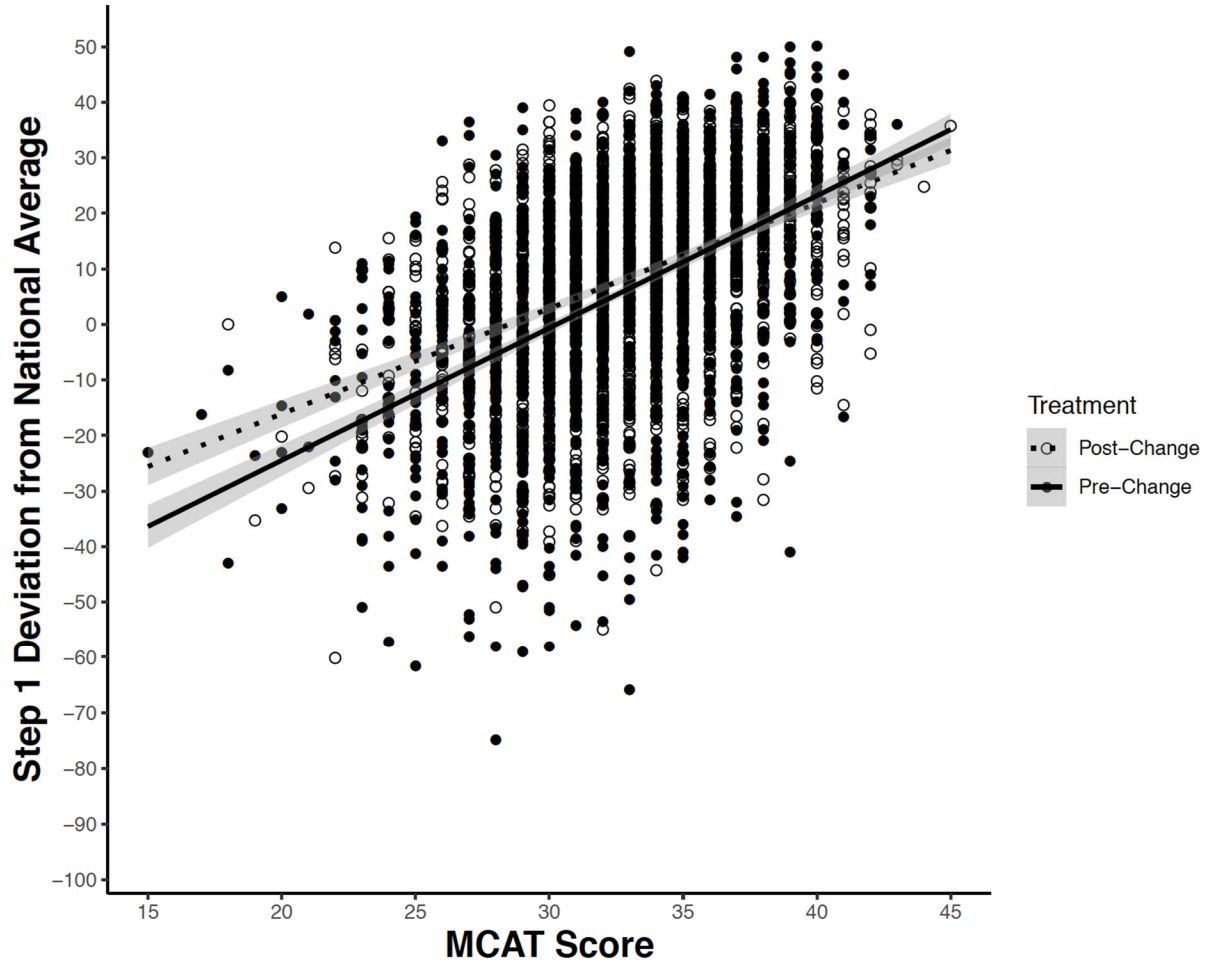

Regression lines depicting the relationship between Step 1 deviation scores from national average and MCAT scores for each curricular change group. The shaded area represents the conditional standard error of the regression line at the corresponding MCAT score.
